# Supplementary material for: THoR: a tool for domain discovery and curation of multiple alignments
Source: Springer Nature journal article supplement (doi:10.1186/gb-2003-4-8-r52), 2003-07-23
Supplement: Additional file 1 [file gb-2003-4-8-r52-s1.doc]

**THoR_HOMOLOGUE?** Q**L**TED**Q**S**RNLL**----KE**F**IQ**Y**IEDN---**K**V**V**L**LE**D**LAS**H**F**G**M**RTQD----**A**IE**RL**Q**T**-**LL**A**D**GC**L**-T**G**V**ID**---**D**RGK**FI**Y**I**TPAEL----------DSVAQ**F**I**RQ**RGRV-

PSD3_DAUCA/1-94 N**L**IVR**L**R**HNVI**---**R**TG**L**RN**I**SIS**Y**---**SRISL**VD**VAR**K**L**R**LD**SPNPVAD**AE**S**IV**S**K**-**AI**R**D**GA**I**-D**ATID**---**H**ANG**W**MVSKETGD----IYS-TNEP**Q**AA**F**N**SRI**AFC-

O61470/1-91 T**L**IIR**L**R**HNVI**---**K**TA**I**RS**I**GLA**Y**---**SRIS**P**Q**D**IAR**K**L**G**LD**SPE---D**AE**F**IV**A**K**-**AI**R**D**GV**I**-E**ATLD**---PEKG**Y**MR**T**KESTD----IYS-TREP**Q**LA**F**H**QRI**SFC-

S50479/1-91 Q**L**CVR**L**R**SNVI**---**K**TG**I**RI**I**SLT**Y**---**KKISLR**D**IC**LK**L**N**LD**SEQ---T**VE**Y**MV**S**R**-**AI**R**D**GV**I**-E**AKIN**---**H**EDG**FI**E**T**TELLN----IYD-SEDP**Q**QV**F**D**ERI**KFA-

O49160/1-89 MVKDRVQ**EEA**V---**R**TY**L**FT**Y**SSS**Y**---**ESLSLD**Q**LAK**M**F**D**VS**EPQ----**V**HS**IV**S**K**-**M**MI**N**EE**L**-H**AS**W**D**---**Q**PTR**CI**V**F**HEVQH----SRL--QSLAFQ**L**T**EKL**SIL-

PSD3_SCHPO/1-91 T**L**ICR**L**R**HTVI**---**K**TG**L**RM**I**SLS**Y**---**SRISLR**D**VC**IK**L**G**LD**SEE---S**AE**Y**IV**A**K**-**GI**R**D**GV**I**-D**ASID**---**H**SNA**F**MASNEAMD----IYS-TEQP**Q**QA**F**H**ERI**QFC-

O88950/1-83 E**H**IEE**L**L**RNIR**---TQV**L**IK**L**IKP**Y**---**TRIHI**PF**ISK**E**L**N**ID**VAD----**VE**S**LL**V**Q**-**CI**L**D**NT**I**-H**GRID**---**Q**VNQ**LL**E**L**DHQ---------KRGGA**R**YT**A**L**DKW**----

O60735/1-90 L**L**HEQNMA**KMR**---**L**LT**F**MG**M**AIEN---**KEISFD**TMQ**Q**E**L**Q**IG**ADD----**VE**A**FV**I**D**-**AV**R**T**KM**V**-Y**CKID**---**Q**TQRK**V**V**V**S-HSTHRTF----GKQR**W**QQ**L**Y**DTL**NAW-

Q20938/1-84 K**H**FHS**L**S**ERML**---**E**KD**L**CR**I**IEP**Y**---**S**F**VQIE**H**VAQ**Q**I**G**ID**RSK----**VE**K**KL**S**Q**-**MI**L**D**QK**L**-S**GSLD**---**Q**GEG**ML**I**V**FEIAV--------PDEA**Y**QT**A**L**DTI**----

Y107_HUMAN/1-84 P**H**YRY**Y**V**REMR**---**I**HA**Y**SQ**L**LES**Y**---**RSLTL**GYM**AE**A**F**G**VG**VEF----**ID**Q**EL**S**R**-**FI**AAGR**L**-H**CKID**---**K**VNE**IV**E**T**NRPDS--------KNWQ**Y**QE**T**I**KKG**----

Q40112/1-91 G**L**VMQVV**SSMY**---**K**RN**I**QR**L**TQT**Y**---L**TLSLQ**D**IAN**TVQ**L**RGPK---Q**AE**M**HV**L**Q**-**MI**E**D**GE**I**-Y**ATIN**---**Q**KDG**MV**R**F**LEDPE----QYK-TCGM**I**EH**I**D**SSI**KRL-

Q99613/1-89 M**L**VRK**I**Q**EE**S**L**---**R**TY**L**FT**Y**SSV**Y**---**DSISME**T**LSD**M**F**E**LD**LPT----**V**HS**II**S**K**-**MI**I**N**EE**L**-M**ASLD**---**Q**PTQ**TV**V**M**HRTEP----TAQ--QNLALQ**L**A**EKL**GSL-

YD95_SCHPO/1-84 A**H**YRY**Y**V**REMR**---**R**RA**Y**AQ**L**LES**Y**---**R**A**LSID**SM**A**AS**F**G**VS**VDY----**ID**RD**L**A**S**-**FI**P**D**NK**L**-N**C**V**ID**---**R**VNG**VV**F**T**NRPDE--------KNRQ**Y**QE**V**V**KQG**----

Q22253/1-94 K**Q**KDF**L**TA**KIR**---**L**MAVME**L**AVS**R**(4)**RSVSFK**E**IAT**KCQ**IP**FDE----**VE**F**LV**M**K**-**AL**S**K**DL**I**-R**GDIN**---**Q**VEQ**VV**Y**V**T-WVQPRVL----DNPQ**I**MQ**M**A**TRI**SAW-

Q94261/1-91 VDETI**L**L**KKIR**---**L**LT**L**MS**L**AEE**K**---**NEISLD**E**LAK**Q**L**D**I**LADE---T**LE**E**FV**I**D**-**AI**QVNA**I**-S**GKIN**---**E**MAR**TL**I**V**S-SYQHRRF----GTEQ**W**VL**L**E**KRL**KVL-

O88543/1-91 G**L**VKQCL**SSLY**---**K**KN**I**QR**L**TKT**F**---L**TLSLQ**DM**AS**RVQ**LS**GPQ---E**AE**K**YV**L**H**-**MI**E**D**GE**I**-F**ASIN**---**Q**KDG**MV**S**F**HDNPE----KYN-NPAM**L**HN**I**D**QEM**LKC-

O02328/1-89 MVVRR**I**Q**EE**S**L**---**R**TY**L**LT**Y**STV**Y**---A**TVSLK**K**LAD**L**F**E**LS**KKD----**V**HS**II**S**K**-**MI**I**Q**EE**L**-S**ATLD**---**E**PTD**CL**I**M**HRVEP----SRL--QMLALN**L**S**DKL**QTL-

Q12250/1-87 H**H**WED**L**Q**KRVI**---**E**HN**L**RV**I**SEY**Y**---**SRITL**LR**LNE**L**L**D**LT**ESQ----**TE**T**YI**S**D**-**LV**N**Q**GI**I**-Y**AKVN**---**R**PAK**IV**N**F**EKPKN--------SSQL**L**NE**W**S**HNV**DEL-

Q04062/1-92 Q**H**ESF**L**R**QKI**C---**L**MT**L**IETVFV**K**N-I**R**M**LSFE**D**ISK**ATH**LP**KDN----**VE**H**LV**M**R**-**AI**SLGL**L**-K**GSID**---**Q**VNE**LV**T**I**S-WVQPRII----SGDQ**I**TK**M**K**DRL**VEW-

O00231/1-84 T**H**LAK**L**Y**DNLL**---**E**QN**L**IRVIEP**F**---**SRVQIE**H**ISS**L**I**K**LS**KAD----**VE**R**KL**S**Q**-**MI**L**D**KKF-H**G**I**LD**---**Q**GEG**VL**I**I**FDEPP--------VDKT**Y**EA**A**L**ETI**----

O81694/1-84 R**H**LSS**L**Y**DTLL**---**E**QN**L**CR**L**IEP**F**---**SRVEI**AH**IAE**L**I**G**LP**LDH----**VE**K**KL**S**Q**-**MI**L**D**KKF-A**GTLD**---**Q**GAG**CL**I**I**FEDPK--------ADAI**Y**SA**T**L**ETI**----

O75831/1-94 ANEAQ**L**L**RKIQ**---**L**LC**L**ME**M**TFT**R**(4)**RQLTFE**E**IAK**SAK**IT**VNE----**VE**L**LV**M**K**-**AL**SVGL**V**-K**GSID**---**E**VDKR**V**H**M**T-WVQPRVL----DLQQ**I**KG**M**K**DRL**EFW-

O00232/1-87 K**R**WKD**L**K**NRV**V---**E**HN**I**RI**M**AKY**Y**---**TRITMK**RM**AQ**L**L**D**LS**VDE----S**E**A**FL**S**N**-**LV**V**N**KT**I**-F**AKVD**---**R**LAG**II**N**F**QRPKDP---N-----NL**L**ND**W**S**QKL**NSL-

PSD3_CAEEL/1-95 T**L**IVR**L**R**QNVI**---**K**TA**I**KQ**I**SLA**Y**---**SRI**Y**IK**D**IAK**K**L**Y**IT**NET---E**TE**Y**IV**A**K**-**AI**A**D**GA**I**-D**A**V**IT**(4)**D**GPR**Y**MQSSETAD----IYR-TSEP**Q**AH**F**D**TRI**RYC-

Q12377/1-84 S**H**FNA**L**Y**DTLL**---**E**SN**L**CK**I**IEP**F**---**ECVEIS**H**ISK**I**I**G**LD**TQQ----**VE**G**KL**S**Q**-**MI**L**D**KIF-Y**G**V**LD**---**Q**GNG**WL**Y**V**YETPN--------QDAT**Y**DS**A**L**E**L**V**----

YE28_CAEEL/1-84 P**H**FNY**Y**S**R**G**MR**---**H**RA**Y**EQ**F**LTP**Y**---**KTVRID**MM**AK**D**F**G**VS**RAF----**ID**R**EL**H**R**-**LI**A**T**GQ**L**-Q**CRID**---AVNG**VI**E**V**NHRDS--------KNHL**Y**KA**V**I**KDG**----

O01423/1-82 E**H**TEE**L**M**NNIR**---TQV**L**LR**L**IRP**Y**---**TNVRIS**Y**LSQ**K**L**K**VS**QKE----**V**IH**LL**V**D**-**AI**L**D**DG**L**-E**AKIN**---**E**ESG**MI**E**M**PKN---------KKKMMVTS**L**VVP-----

FUS6_ARATH/1-84 D**H**VDT**L**Y**DQIR**---**K**KA**L**IQ**Y**TLP**F**---V**SVDLS**RM**AD**A**F**K**TS**VSG----**LE**K**EL**EA-**LI**T**D**NQ**I**-Q**ARID**---**S**HNK**IL**Y**A**RHADQ--------RNAT**F**QK**V**L**Q**M**G**----

Q06103/1-84 R**H**ADF**F**V**REMR**---**R**KV**Y**AQ**L**LES**Y**---**KTLSLK**SM**AS**A**F**G**VS**VAF----**LD**ND**L**G**K**-**FI**P**N**KQ**L**-N**C**V**ID**---**R**VNG**IV**E**T**NRPDN--------KNAQ**Y**HL**L**V**KQG**----

YMJ5_CAEEL/1-87 V**H**SQN**L**E**RNML**---**E**KE**I**SRVIEP**Y**---**SEIELS**Y**IAR**V**I**G**MT**VPP----**VE**RA**I**A**R**-**MI**L**D**KK**L**-M**GSID**---**Q**HGD**TV**V**V**YPKADA--------ANQ**F**TRSL**KTI**REL-

D1032703/1-92 FDEDA**I**A**RKMK**---**L**LT**I**AS**L**ATQAP-N**NTLSY**GD**VAK**S**L**K**ID**ENE----**VE**L**WI**I**D**-**VI**RAGL**V**-E**GR**M**S**---**Q**LTK**TL**S**I**H-RSSYRVF----GKHE**W**VA**L**H**EKL**AKW-

G3885329/1-83 N**Y**MED**L**L**KKVR**---TQV**L**LK**L**IKP**Y**---**TKI**G**I**PF**ISK**E**L**N**VP**ETD----**V**TE**LL**V**S**-**LI**L**D**SR**I**-D**GHID**---**E**MNR**YL**LRGDS---------GNGRK**L**HK**A**V**DKW**----

O14164/1-85 M**L**SEK**I**R**EEGL**---**R**TY**L**LA**Y**AAF**Y**---**DSVSLE**F**LAT**T**F**D**LP**VQR----**V**TV**IV**S**R**-**LL**S**K**RE**I**-H**A**A**LD**---**Q**VHG**AI**I**F**ERVEI----NKL--ESLTVS**L**S**EK**-----

P91586/1-83 DGSNI**L**H**R**A**V**T---**E**HN**L**LSASKL**Y**---**NNIRFT**E**LG**AL**L**E**IP**HQM----**AE**KVAS**Q**-**MI**C**E**SRM-K**GHID**---**Q**IDG**IV**F**F**ERR------------ET**L**PT**W**DV**QI**QSL-

Q19324/1-88 K**R**WSD**L**HL**RV**G---**E**HN**M**RM**I**AKY**Y**---**TQITFE**R**LAE**L**L**D**FP**VDE----**ME**S**FV**C**N**-**LI**V**T**GQ**I**TG**AKL**H---**R**PSR**IV**N**L**-RLKKA---NV----EQ**L**DV**W**A**SNV**HKL-

INT6_MOUSE/1-85 ACLED**F**I**ENAR**---**L**FI**F**ET**F**CRI**H**---**QCISIN**M**LAD**K**L**N**MT**PEE----**AE**R**WI**V**N**-**LI**R**N**AR**L**-D**AKID**---**S**KLG**HV**V**M**GNNAV----------SP**Y**QQ**V**I**EKT**KSL-

G01646/1-84 P**H**VRT**L**Y**TQIR**---NRA**L**IQ**Y**FSP**Y**---V**S**A**DMH**RM**A**AA**F**N**TT**VAA----**LE**D**EL**T**Q**-**LI**L**E**GL**I**-S**ARVD**---**S**HSK**IL**Y**A**RDVDQ--------RSTT**F**EKSLLM**G**----

E1343352/1-90 P**Q**LTN**L**F**S**L**IR**---**E**RS**L**LD**Y**LIP**Y**---**S**A**L**P**FS**K**IA**VD**F**H**ID**ENF----**IE**KN**L**L**E**-**II**EAKK**L**-N**GKVD**---**S**LQKR**V**Y**I**EPSSEPEN------FED**I**KN**I**A**QT**SLLYS

Q14152/1-81 Q**Y**VPQ**L**Q**NNTI**---**L**RL**L**QQVSQI**Y**---**QSIEFS**R**LTS**LVP**FV**DAF---Q**LE**RA**I**V**D**-**A**AR**H**CD**L**-Q**VRID**---**H**TSR**TL**S**F**GSD-------------LNYA**T**R**EDA**P---

O13895/1-90 I**H**MNR**L**I**EDGR**HFL**E**TN**I**LF**L**SEF**F**---**E**VS**S**T**S**I**LAK**H**F**K**LS**EEQ----**VD**TV**V**A**D**-**MV**I**Q**ER**L**-N**ASID**---**Q**CEG**YI**T**F**LPEYG--------KANN**L**PN**Y**V**NKI**ATV-

O74760/1-92 Q**Y**IRP**L**Q**Q**V**IL**---TRL**F**QQ**L**SQV**Y**---**DSISLK**Y**V**M**D**LAT**F**EEPY(5)Q**IE**K**FI**M**N**-**G**NK**K**GAF-SI**RLN**---**H**IENS**I**S**F**SSDLF--------SNPI**K**SSDSV**SL**QS--

O81247/1-92 H**L**SPD**Q**IL**KLK**---**Q**LTVLT**L**AESN---**K**V**L**P**YD**T**L**MVE**L**D**VS**NVR---E**LE**D**FL**I**N**E**C**MYAGI**V**-R**GKLD**---**Q**LKR**C**FE**V**P-FAAGRDL----RPGQ**L**GN**M**L**HTL**SNW-

Q40554/1-91 Q**Y**VPA**L**E**K**L**A**T---**L**RL**L**QQVSQV**Y**---**QTIQID**N**ISK**M**I**P**F**FDFT---V**IE**K**I**SV**D**-**AV**R**R**NF**L**-AI**KVD**---**H**MKG**L**SS**L**VNRVL----RRKDSGIICLF**L**A**ESL**SK--

NIP1_YEAST/1-86 S**L**TERVQV**E**S**L**---**K**TY**F**FS**F**KRF**Y**---**SS**F**S**VAK**LAE**L**F**D**LP**ENK----**V**VEV**L**Q**S**-**VI**A**E**LE**I**-P**AKLN**---**D**EKT**I**FV**V**EKGDEIT-----KLEEA**M**VK**L**N**KE**-----

EG45_CAEEL/1-82 Q**Y**VES**L**QAV**A**A---VKA**L**KQVSVI**Y**---**E**A**ISWE**R**I**R**K**I**I**P**F**YSDL---A**LE**R**LV**V**E**-**A**SK**H**RI**V**-K**AQLD**---**H**RAD**CV**R**F**GSS--------------DAT**L**AGG**V**DEC-

Q00648/1-94 P**L**SEE**Q**A**RKLR**---**L**LT**L**LS**L**AST**I**---**K**P**LTYE**A**L**M**T**S**L**S**LS**APS---E**LE**S**LV**T**T**-**AI**Y**S**SL**I**-T**GRLS**P-A**T**NPP**TV**N**V**TSVAPLRDV----KPSS**L**PT**M**I**STL**TAW-

IF32_YEAST/1-88 Q**Y**IAP**L**R**D**V**IM**---**R**RV**F**VAASQK**F**---**TTVSQS**E**L**Y**K**LAT**LP**APL(5)D**IE**KS**L**L**Q**-**A**AV**E**DY**V**-SI**TID**---**H**ESAK**V**T**F**AKD-------------P**F**DI**F**A**STA**SKE-

YIH1_YEAST/1-92 S**W**SSSAAVI**MR**---CKI**Y**FF**Y**LRIS---**KKLQFS**Y**LSS**T**L**G**ID**LED----**I**KE**EL**T**K**-**LI**I**S**GQ**L**-NF**EID**(4)**H**FEDSSI**L**QSIVNEIS----RNGTM**I**NE**V**I**DKL**----

O88547/1-91 E**L**SVA**Q**Q**NKL**N---**H**LT**I**LS**L**ASR**M**---**KCI**P**YS**V**L**L**K**D**L**E**M**RNLR---E**LE**D**LI**I**E**-**AV**Y**T**DI**I**-Q**GKLD**---**Q**RNQ**LL**E**V**D-FCIGRDI----RKKD**I**NN**I**V**KTL**HEW-

O88546/1-91 P**L**TDA**Q**K**NKLR**---**H**LSVVT**L**AAKV---**KCI**P**Y**AV**L**L**E**A**L**A**L**RNVR---Q**LE**D**LV**I**E**-**AV**YADV**L**-R**GSLD**---**Q**RNQR**L**E**V**D-YSIGRDI----QRQD**L**SA**I**A**QTL**QEW-

Consensus/80% .b...b.pphb...b..b..b...b...pplpbp.lsp.b.hs.......h-.bl.p.hl.p..l..spls...p...hl.h.................b..h.pph....
